# Supplementary material for: Lake O'Hara alpine hydrological observatory: hydrological and meteorological dataset, 2004–2017
Source: Copernicus journal article supplement (doi:10.5194/essd-11-111-2019), 2019-01-22
Supplement: Supplementary file 1 [file essd-11-111-2019-supplement.pdf]

Supplement of Earth Syst. Sci. Data, 11, 111–117, 2019  
<https://doi.org/10.5194/essd-11-111-2019-supplement>  
© Author(s) 2019. This work is distributed under  
the Creative Commons Attribution 4.0 License.

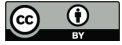

Open Access  
Earth System  
Science  
Data

*Supplement of*

## **Lake O’Hara alpine hydrological observatory: hydrological and meteorological dataset, 2004–2017**

**Jesse He and Masaki Hayashi**

*Correspondence to:* Jesse He (jehe@ucalgary.ca)

The copyright of individual parts of the supplement might differ from the CC BY 4.0 License.

Table S1. Ranges of dates where OHAWS was affected by snow capping (i.e. periods over which precipitation data at OHAWS were approximated from their relationship to precipitation recorded at OPAWS). Total precipitation approximated over snow capping periods is also shown.

| Start      | End        | Total precipitation (mm) |
|------------|------------|--------------------------|
| 2011-02-14 | 2011-03-09 | 37.8                     |
| 2012-03-04 | 2012-04-10 | 170.0                    |
| 2012-12-11 | 2013-01-15 | 47.8                     |
| 2014-01-09 | 2014-01-26 | 41.1                     |
| 2014-11-21 | 2015-01-21 | 137.6                    |
| 2016-11-27 | 2017-01-11 | 52.7                     |



Table S3. Universal Transverse Mercator coordinates of weather (OHAWS and OPAWS) and stream gauging stations (Zone 11, North American Datum 1983).

| Station            | Easting | Northing |
|--------------------|---------|----------|
| OHAWS              | 545820  | 5689974  |
| OPAWS              | 547234  | 5688222  |
| Gorge              | 546951  | 5688770  |
| Mary               | 546407  | 5689381  |
| Oesa Falls         | 546986  | 5689650  |
| Outlet             | 546024  | 5689869  |
| Upper Opabin Creek | 547193  | 5688116  |
| Hungabee           | 547340  | 5688082  |
| Opabin West        | 546750  | 5689402  |
| Opabin East        | 546900  | 5689437  |
| Lefroy Oesa        | 547951  | 5689574  |

Table S4. Measured sensor heights and height adjustments at OPAWS and OHAWS over the monitoring period of 2004 – 2017. Heights were measured from sensor to ground surface with measuring tape and are precise up to (roughly) the nearest centimeter. On dates where height measurement corresponds with height adjustment, heights prior to adjustment are given. This is not a complete record of sensor height changes.

| Station        | Date      | Sensor         | Height (m) | Height adjustment |                     |
|----------------|-----------|----------------|------------|-------------------|---------------------|
| OPAWS          | 11-Jun-15 | SR-50          | 2.42       |                   |                     |
|                |           | HMP35          | 2.53       |                   |                     |
|                |           | Geonor T200B   | 2.37       |                   |                     |
|                |           | CNR1           | 2.69       |                   |                     |
|                | 28-Aug-12 | SR-50          | 2.49       |                   | Raised from 2.51 m  |
|                |           | CNR1           | 2.74       |                   | Lowered from 3.24 m |
|                |           | HMP35          | 2.60       |                   | Lowered from 4.37 m |
|                |           | RM Young 05103 | 4.05       |                   |                     |
|                | 24-Sep-07 | SR-50          | 2.87       |                   |                     |
|                |           | CNR1           | 2.71       |                   |                     |
| HMP35          |           | 3.40           |            |                   |                     |
| RM Young 05103 |           | 4.67           |            |                   |                     |
| 20-Jun-06      | SR-50     | 1.56           |            |                   |                     |
| OHAWS          | 11-Jun-15 | SR-50          | 2.15       |                   |                     |
|                |           | HMP35          | 2.19       |                   |                     |
|                |           | NR-Lite        | 2.00       |                   |                     |
|                |           | RM Young 05103 | 3.10       |                   |                     |
|                |           | Geonor T200B   | 2.22       |                   |                     |
| 28-Sep-11      | SR-50     | 2.10           |            |                   |                     |
| 21-Jun-06      | SR-50     | 1.56           |            |                   |                     |
